# Supplementary material for: Is plant mitochondrial RNA editing a source of phylogenetic incongruence? An answer from in silico and in vivo data sets
Source: PubMed Central journal article supplement (PMC2323663; doi:10.1186/1471-2105-9-s2-s14), 2008-03-26
Supplement: 1471-2105-9-S2-S14-S1.pdf [file 1471-2105-9-S2-S14-S1.pdf]

### List of plant mitochondrial genes used in this study:

| Genes        | Sequences | Mean length | Editing percentage |
|--------------|-----------|-------------|--------------------|
| <i>atp1</i>  | 7         | 1527.86     | 0.85               |
| <i>matR</i>  | 8         | 2023.50     | 1.24               |
| <i>atp8</i>  | 8         | 504.00      | 2.58               |
| <i>rps3</i>  | 7         | 1670.14     | 2.93               |
| <i>nad1</i>  | 7         | 980.57      | 4.90               |
| <i>ccb3</i>  | 7         | 735.43      | 6.66               |
| <i>atp6</i>  | 9         | 962.00      | 3.43               |
| <i>cox3</i>  | 9         | 802.67      | 3.86               |
| <i>rps12</i> | 14        | 377.79      | 4.24               |
| <i>nad5</i>  | 7         | 2012.14     | 1.99               |
| <i>rpl5</i>  | 8         | 568.13      | 2.46               |
| <i>atp4</i>  | 7         | 602.57      | 3.65               |
| <i>nad6</i>  | 7         | 642.43      | 4.05               |
| <i>rps13</i> | 8         | 350.25      | 2.86               |
| <i>cob</i>   | 10        | 1183.50     | 3.72               |
| <i>cox2</i>  | 16        | 774.75      | 4.26               |
| <i>ccb2</i>  | 7         | 621.00      | 11.27              |
| <i>nad3</i>  | 19        | 363.00      | 14.05              |
| <i>atp9</i>  | 16        | 234.19      | 6.41               |
| <i>nad9</i>  | 9         | 606.00      | 2.81               |

The editing percentage is calculated for each multiple alignment as the proportion of site patterns containing at least one editing event over the total number of site patterns.

### Appendix A

EdiPy is available by authors upon request or, alternatively, it can be used on-line at the following web page: [http://biologia.unical.it/py\\_script/index.html](http://biologia.unical.it/py_script/index.html). EdiPy can run on whatever platform provided of Python interpreter (at least version 2.3) and Numeric module [14].

### Appendix B

Trees and relative branch lengths used for simulations are provided in Newick format as follow:

12 taxa tree

(((T12:0.050342,T8:0.0301736):0.013584,T1:0.011636):0.0348676,((T3:0.005542,T6:0.0118624):0.0372248,T2:0.014572):0.0365044):0.0329892,((T4:0.0182456,T5:0.0574204):0.0240032,(T11:0.0357984,((T10:0.0116456,T9:0.0399844):0.0245788,T7:0.020912):0.0187456):0.0336708):0.0025172);

18 taxa tree

(((T17:0.0515495,T18:0.035304):0.0162625,(T3:0.0140595,T4:0.008812):0.0145515):0.0323555,((T11:0.029959,T12:0.0438415):0.008869,T1:0.0270665):0.012289):0.0091555,(((T9:0.0513715,T10:0.0333935):0.0249595,(T15:0.0138605,T16:0.0377015):0.0151685):0.0221415,(T7:0.0396135,T8:0.016999):0.020538):0.022816,(((T5:0.0025265,T6:0.002508):0.024128,(T13:0.0065525,T14:0.006464):0.0312225):0.0422945,T2:0.0137415):0.028193):0.0509899);

24 taxa tree

(((T1:0.133795,(T23:0.001892,T24:0.002000):0.135488):0.024121,(((T13:0.018254,T14:0.018429):0.041514,T5:0.059898):0.037671,(T15:0.014466,T16:0.014097):0.082975):0.061977):0.039464,(((T6:0.048751,((T9:0.030342,T10:0.029709):0.010513,T8:0.040896):0.006757):0.041584,(T11:0.021047,T12:0.020510):0.067881):0.012670,(T2:0.064097,T3:0.063507):0.035400):0.048746,(((T17:0.012142,T18:0.012170):0.032758,T7:0.045084):0.049591,((T4:0.060269,(T19:0.006039,T20:0.006564):0.053260):0.009095,(T21:0.004220,T22:0.004298):0.065208):0.023291):0.056861):0.045604);
